# Supplementary material for: OCT4 Coordinates with WNT Signaling to Pre-pattern Chromatin at the SOX17 Locus during Human ES Cell Differentiation into Definitive Endoderm
Source: PubMed Central journal article supplement — Stem Cell Reports. 2015 Sep 24;5(4):490–8. doi: 10.1016/j.stemcr.2015.08.014 (PMC4624996; doi:10.1016/j.stemcr.2015.08.014), 2015-09-24
Supplement: mmc1.pdf [file mmc1.pdf]

Stem Cell Reports, Volume 5

Supplemental Information

**OCT4 Coordinates with WNT Signaling to Pre-pattern  
Chromatin at the *SOX17* Locus during Human  
ES Cell Differentiation into Definitive Endoderm**

Lei Ying, Jason A. Mills, Deborah L. French, and Paul Gadue

# Supplemental Figures

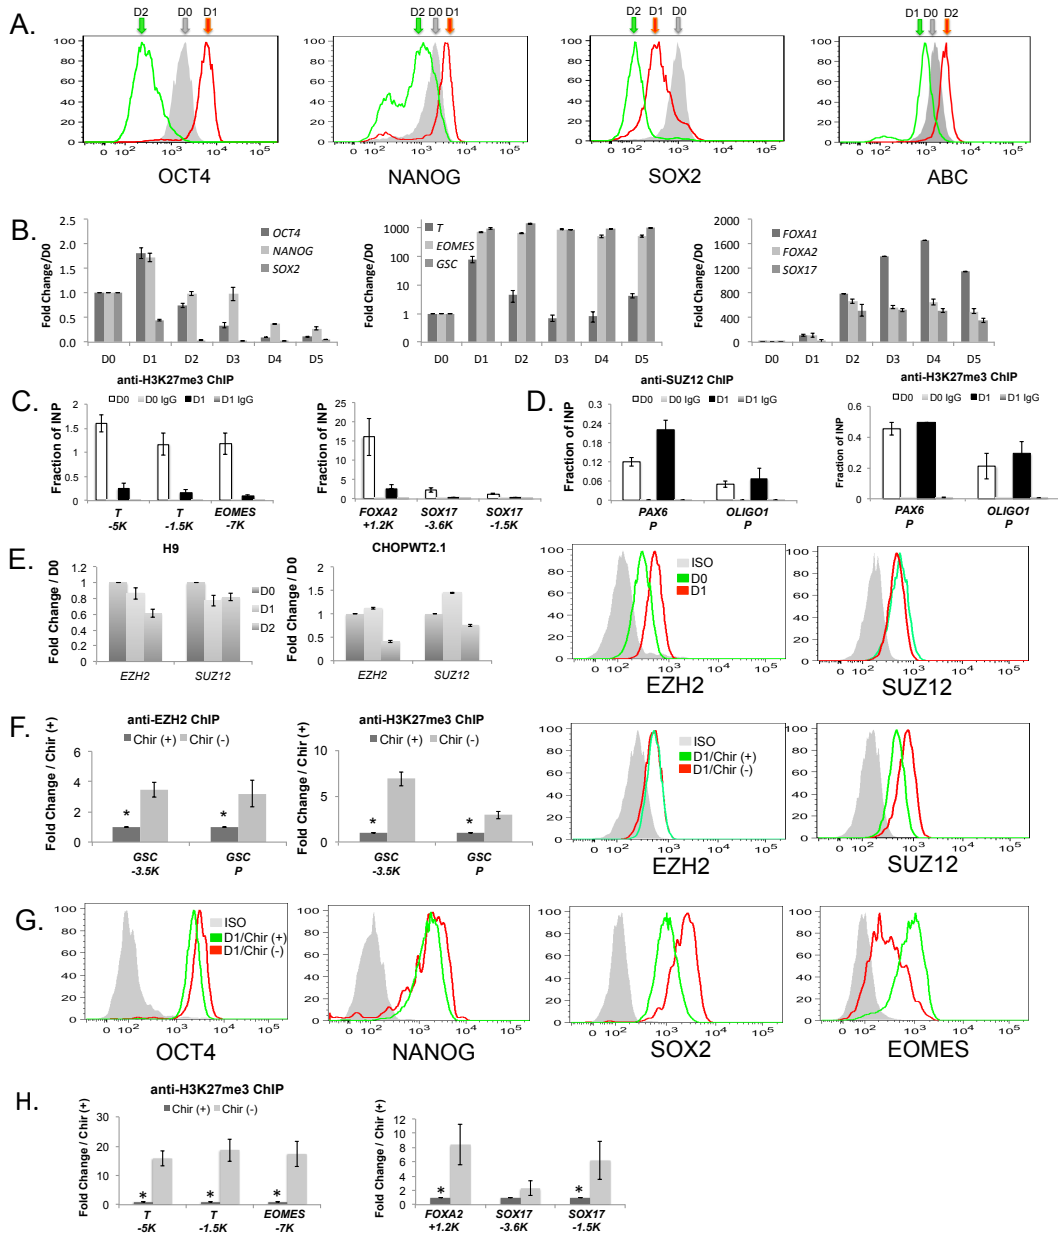

**Figure S1: Gene expression profiles and ChIP-qPCR data during endoderm differentiation.**

A. Flow cytometry analysis of OCT4, NANOG and SOX2 and activated  $\beta$ -Catenin (ABC) on D0, D1 and D2 H9 endoderm differentiation cultures. B. Time course qRT-PCR expression profiles of pluripotency genes (*OCT4*, *NANOG* and *SOX2*), primitive streak genes (*T*, *EOMES*, and *GSC*) and endodermal genes (*FOXA1*, *FOXA2* and *SOX17*) in H9 endoderm differentiation cultures. C. Anti-H3K27me3 ChIP-qPCR analysis on regulatory regions of primitive streak genes (*T* and *EOMES*) and endodermal genes (*FOXA2* and *SOX17*) in CHOPWT2.1 iPS cell endoderm differentiation cultures on D0 and D1. D. Anti-SUZ12 ChIP-qPCR on neuroectoderm gene loci in H9 hES cell differentiation cultures at D0 and D1. E. (left panel) *EZH2* and *SUZ12* qRT-PCR expression profiles in H9 and CHOPWT2.1 differentiation cultures on D0, D1 and D2. (right panel) *EZH2* and *SUZ12* intracellular flow cytometric analysis on H9 hES cells at D0 and D1. F. (left panel) Anti-*EZH2* and anti-H3K27me3 ChIP-qPCR on D1 endoderm differentiation cultures of H9 ES cells treated with and without Chir. (right panel) *EZH2* and *SUZ12* intracellular flow cytometry on D1 endoderm differentiation cultures of H9 ES cells treated with and without Chir. Data shown are from three independent experiments. Statistical significance represented as \* for  $p < 0.05$ . G. Flow cytometry analysis of OCT4, NANOG, SOX2 and *EOMES* on D1 of CHOPWT2.1 iPS cell differentiation cultures with and without Chir. H. Anti-H3K27me3 ChIP-qPCR in CHOPWT2.1 iPS cell differentiation cultures on D1 with and without Chir. Sites used for ChIP-qPCR are indicated in kilobases (K) from the transcription start site. Data shown are from three independent experiments. Statistical significance indicated as \* for  $p < 0.05$ .

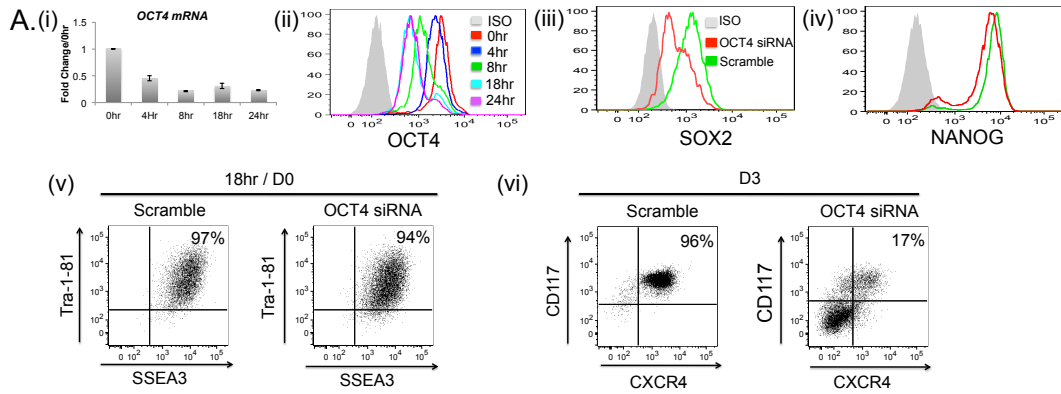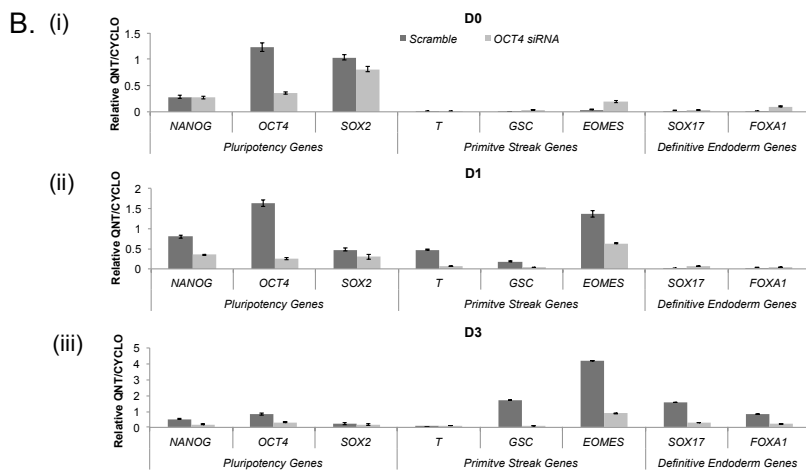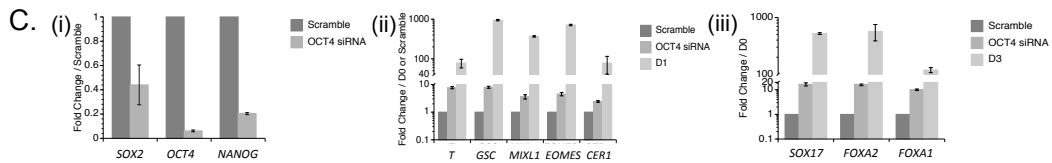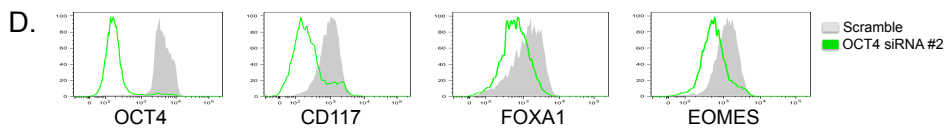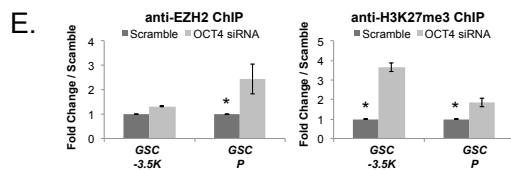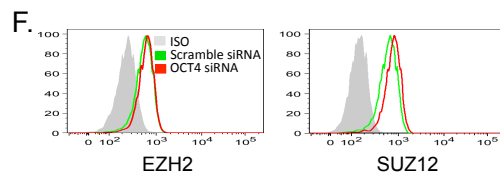

**Figure S2. Gene expression profile and ChIP-qPCR after OCT4 knockdown.**

A. (i) QRT-PCR and (ii) Flow cytometry time course of OCT4 siRNA knockdown in H9 ES cells. (iii-vi) Flow cytometry analysis of pluripotency markers (iii) SOX2, (iv) NANOG, (v) SSEA3 and TRA-1-81 on H9 hES cells transfected with scramble or OCT4-siRNA at D0 (18 hours after transfection) and (vi) definitive endoderm markers, CXCR4 and CD117, on D3 endoderm differentiation cultures. B. QRT-PCR gene expression analysis of H9 ES cells 72 hrs after OCT4 siRNA knockdown (i) pluripotency genes, (ii) primitive streak genes comparing to D1 differentiation cells and (iii) definitive endoderm genes comparing to D3 differentiation cells. C. QRT-PCR gene expression analysis of endoderm differentiation cultures at (i) D0, (ii) D1 and (iii) D3 after OCT4 knockdown. D. A second OCT4 siRNA (#2) can also knockdown OCT4 and impair endoderm differentiation. Flow cytometry analysis on OCT4 and endodermal markers in differentiation cultures as described in figure 3. E. ChIP-qPCR analysis of anti-EZH2 and anti-H3K27me3 at GSC regulatory regions after OCT4 knockdown at D1 of endoderm differentiation cultures. Sites used for ChIP-qPCR are indicated in kilobases (K) from the transcription start site. Data shown are from three independent experiments. Statistical significance indicated as \* for  $p < 0.05$ . F. EZH2 and SUZ12 intracellular flow cytometric analysis on H9 D1 OCT4 knockdown cells.

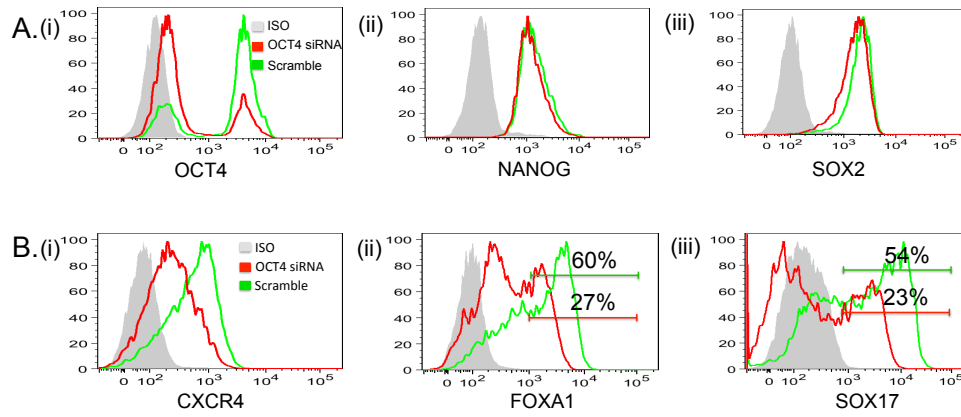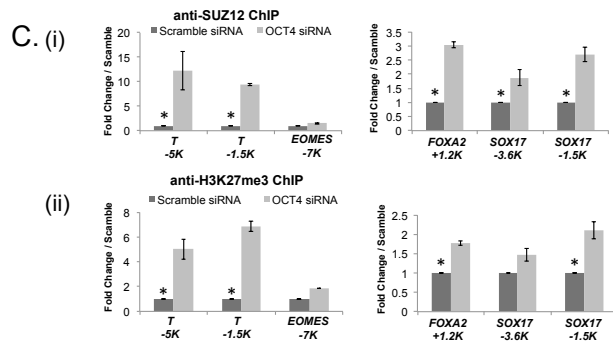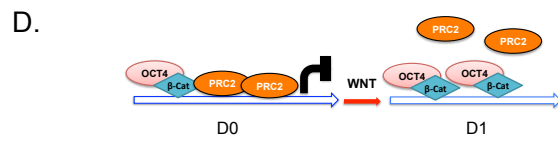

**Figure S3. Analysis of *OCT4* knockdown in CHOPWT2.1 iPS cells.**

CHOPWT2.1 iPS cells were transfected with siRNA against *OCT4* or a control scramble siRNA construct 18 hours prior to initiation of endoderm differentiation as described in Figure 1. A. Flow cytometry analysis of SOX2, NANOG and *OCT4* 18 hrs after *OCT4* siRNA transfection. B. Flow cytometry analysis of CXCR4, FOXA1, and SOX17 on D3 differentiation cultures treated with *OCT4* or scramble siRNA. C. (i) Anti-SUZ12 and (ii) anti-H3K27me3 ChIP-qPCR of D1 differentiation cultures treated with *OCT4* or scramble siRNA on primitive streak genes (*T* and *EOMES*) and endodermal genes (*FOXA2* and *SOX17*). Sites used for ChIP-qPCR are indicated in kilobases (K) from the transcription start site. Data shown are from of three independent experiments. Statistical significance represented as \* for  $p < 0.05$ . D. Working model of how *OCT4* and  $\beta$ -Catenin cooperate to evict the PRC2 complex and allow endodermal gene expression.

## Supplemental Tables

Table S1. siRNA Sequence

| Sequence Name             | Sequence                                                       |
|---------------------------|----------------------------------------------------------------|
| <i>OCT4</i> #1 Anti-Sense | rUrArC rUrGrG rUrUrC rGrCrU rUrUrC rUrCrU rUrUrC rGrGrG rCrCrU |
| <i>OCT4</i> #1 Sense      | rGrCrC rCrGrA rArArG rArGrA rArArG rCrGrA rArCrC rArGT A       |
| <i>OCT4</i> #2 Anti-Sense | rUrCrC rArGrG rUrUrG rCrCrU rCrUrC rArCrU rCrGrG rUrUrC rUrCrG |
| <i>OCT4</i> #2 Sense      | rArGrA rArCrC rGrArG rUrGrA rGrArG rGrCrA rArCrC rUrGG A       |
| Scramble Antisense        | rArUrG rArUrA rUrArG rArCrG rUrUrG rUrGrG rCrUrG rUrUrG rUrArG |
| Scramble Sense            | rArCrA rArCrA rGrCrC rArCrA rArCrG rUrCrU rArUrA rUrCA T       |

Table S2. Primers for ChIP

| NAME               | Forward                             | Reverse                         |
|--------------------|-------------------------------------|---------------------------------|
| <i>EOMES</i> -7K   | GGA GAA GGC ACC CTT AAC TGG ATG T   | GAT CTT GCT CTG CAC TTG CTC TGT |
| <i>GSC</i> -3.5K   | CCA GTC TCA AAG CTA AGT GCT CAA ACC | TCC ACC CAC CCA ACC TCA C       |
| <i>GSC</i> P       | ACA GAG CAG GTG AAG AGA GAG CAA     | ACA GAG CAG GTG AAG AGA GAG CAA |
| <i>FOXA2</i> +1.2K | ACCTCGGGCTCTGCATAGTA                | TTTAAACTGCCATGCACTCG            |
| <i>OLIGO1</i> P    | GGCACAAGCAGCCAATGAACAC              | CTTTAAACCCGGCTTGGGAACCT         |
| <i>PAX6</i> P      | GCGGACTCACCTTTATGAGG                | CCATTGTGGTCTTCAAGCAA            |
| <i>SOX17</i> -1.5K | CCCTAGCCAAGGCTTCACAGATACTT          | CCGTCTGTCCAGTCTTGCTTATTAGTGG    |
| <i>SOX17</i> -3.6K | AGCGGTGTA CTGGCTCTTA                | GCCACATGTAAGCAGCAAA             |
| <i>T</i> -1.5K     | CAGGTGGTCCACTCGGTACT                | AGGGAAGGTGGATCTCAGGT            |
| <i>T</i> -5K       | ACCAGAGAGTCCAGGGAGGT                | GGCTCTCTTCTCATGTGC              |

Table S3. Primers for RT-PCR

| NAME         | Forward                             | Reverse                                   |
|--------------|-------------------------------------|-------------------------------------------|
| <i>CER1</i>  | TCCCATACCTCCTGCTCTCACTGTTT          | TGTGTCCATCTTCATGCTCCGTCTTC                |
| <i>CYCLO</i> | GAA GAG TGC GAT CAA GAA CCC ATG AC  | GTC TCT CCT CCT TCT CCT CCT ATC TTT ACT T |
| <i>EOMES</i> | TAT TGT CGG CTT TGC CAC AGG TCA     | ACT CAA TCC CAC TGC CCA CTA CAA           |
| <i>EZH2</i>  | AGG AGT GTA AGC TTT GCT CTC TCT GA  | CAC CGA ACA GCA GCT CCC A                 |
| <i>FOXA2</i> | GCA CCT TCA GGA AAC AGT CGT TGA     | ACT CGT ACA TCT CGC TCA TCA CCA           |
| <i>FOXA1</i> | ACT ACT CCT TCA ACC ACC CGT TCT     | TAT TGC AGT GCCTGT TCG TAT GCCTTG         |
| <i>GSC</i>   | GGT ACT TGG TCT CCT GGA AGA GGT T   | ATG CTG CCC TAC ATG AAC GTG G             |
| <i>MIXL1</i> | TAG ATG TGA ACT GCC TGC CCG AA      | TGT TCC TCC CAT GAG TCC AGC TTT           |
| <i>NANOG</i> | CCTGAAGACGTGTGAAGATGAG              | GCTGATTAGGCTCCAACCATAC                    |
| <i>OCT4</i>  | TTC GGG CAC TGC AGG AAC AAA TTC     | TAT GCA AAG CAG AAA CCC TCG TGC           |
| <i>SOX17</i> | AGG AAA TCC TCA GAC TCC TGG GTT     | CCC AAA CTG TTC AAG TGG CAG ACA           |
| <i>SOX2</i>  | ATG ACC AGCTCG CAG ACCTAC A         | GGA CTT GAC CAC CGA ACC CA                |
| <i>SUZ12</i> | TGT CGA AAC TTC ATG CTT CAT CTA GTC | TGT TCT TCA GTT ATT TCT TTT GCA           |
| <i>TBP</i>   | TTG CTG AGA AGA GTG TGC TGG AGA TG  | CGT AAG GTG GCA GGC TGT TGT T             |



## **Supplemental Experimental Procedures**

### *ChIP-qPCR Assay*

ChIP assays were carried out as previously described (Tuteja et al., 2008). Briefly, cells were crosslinked with 1% formaldehyde. Ideal length of chromatin fragments (300 – 500 bp) was achieved by sonicating with Misonix3000 with a micro tip. Chromatin was immunoprecipitated with following antibodies: H3K27me3 (Millipore, 07-449), OCT4 (Santa Cruz, sc-8628), EZH2 (Active Motif, 39875), SUZ12 (Abcam, ab12073). Primer sequences are listed in Table S2.

### *Gene Ontology Analysis*

The hES OCT4 ChIP-seq dataset (GSE21916) (Marson et al., 2008) and H3K4me3 and H3K27me3 ChIP-seq dataset (GSE23455) (Guenther et al., 2010) were used. Co-occupancy of OCT4 and bivalent domains was obtained by intersecting 2 datasets using GALAXY (Goecks et al., 2010). Then, gene ontology term enrichment was computed by feeding GREAT (McLean et al., 2010) with OCT4 binding bivalent domain position information.

### *Flow Cytometry and Immunofluorescence*

Flow cytometry was carried out as previously described (Gadue et al., 2006). Briefly, for cell surface markers, cells were resuspended in FACS buffer and stained with anti-CXCR-4-PE (Invitrogen, MXCXCR404) and anti-CD117-APC (Invitrogen, CD11705). For intracellular markers, cells were fixed with 1.6% PFA and permeabilized with saponin buffer (Biolegend). Antibodies used for intracellular staining were anti-OCT4 (Santa Cruz, sc-5279), anti-SOX2 (BD MAB2018), anti- $\beta$ -Catenin (BD, 610154), anti-FOXA1 (Santa Cruz, sc-101058) and biotinylated anti-SOX17 (R&D, BAF1924). Cells were acquired with BD FACS Canto II (BD Sciences). Data were analyzed with FlowJo software.

For immunofluorescence staining, cells were replated onto matrigel-coated glass cover slips. Cells were harvest at D0, D1 and D2 of differentiation and fixed with 1% PFA. Cells were permeabilized with 0.1% Triton-X 100. Antibodies used for immunofluorescence staining were anti-OCT4 (Santa Cruz, sc-5279), anti- $\beta$ -Catenin (BD, 610154). Stained cells were mounted with ProLong Gold anti-fade mountant with DAPI (Invitrogen). The stained cells were visualized using a fluorescence microscope (Leica DMI 4000B) and images captured and analyzed using the Leica Application Suite software. Distribution of fluorescence intensity across a single representative cells was measured and plotted, demonstrating nuclear localization of ABC at D1.

### *Reverse Transcription and Real-time Quantitative PCR (qRT-PCT)*

RNA was extracted using RNeasy Micro RNA Extraction kit (Qiagen). Reverse transcription was performed using SuperScript III (Invitrogen), as per manufacturer instructions. Quantitative PCR was performed on a Light Cycler 480 (Roche) using LightCycler SYBR Green Master Mix I (Roche) and normalized to the housekeeping genes TBP or CYCLOPHILIN. Data shown are representative of three independent experiments. Statistical significance indicated as \* for  $p < 0.05$ . Primer sequences are listed in Table S3.

### *Western Blot and Immunoprecipitation*

Western blot and immunoprecipitation were carried out as previously described (Kelly et al., 2011). For immunoprecipitation, 20 million of D0 hESCs or D1 cells were treated with hypotonic buffer for 10 min on ice, then, nuclei protein was extracted with high salt buffer. 400  $\mu$ g of nuclei protein was subjected to immunoprecipitation with anti-OCT4 antibody (Santa Cruz, sc-8628). Eluted material was blotted with either anti-OCT4 antibody (Santa Cruz, sc-8628), anti-total $\beta$ -catenin antibody (BD) or anti-activated $\beta$ -catenin antibody (Life Sciences, 712700).

### *Statistics*

All experiments were performed at least three times and statistical significance was calculated by Student's t test. For ChIP qPCR results,  $p$  value was calculated by Student's T test. Error bars represent SEM from 3 biological replicates. All experiments were performed at least three times. Results with statistic significance ( $p < 0.05$ ) were labeled with asterisk (\*).

## Supplemental References

Goecks, J., Nekrutenko, A., Taylor, J., and Galaxy, T. (2010). Galaxy: a comprehensive approach for supporting accessible, reproducible, and transparent computational research in the life sciences. *Genome biology* 11, R86.

Guenther, M.G., Frampton, G.M., Soldner, F., Hockemeyer, D., Mitalipova, M., Jaenisch, R., and Young, R.A. (2010). Chromatin structure and gene expression programs of human embryonic and induced pluripotent stem cells. *Cell Stem Cell* 7, 249-257.

Kelly, K.F., Ng, D.Y., Jayakumaran, G., Wood, G.A., Koide, H., and Doble, B.W. (2011). beta-catenin enhances Oct-4 activity and reinforces pluripotency through a TCF-independent mechanism. *Cell Stem Cell* 8, 214-227.

Marson, A., Levine, S.S., Cole, M.F., Frampton, G.M., Brambrink, T., Johnstone, S., Guenther, M.G., Johnston, W.K., Wernig, M., Newman, J., *et al.* (2008). Connecting microRNA genes to the core transcriptional regulatory circuitry of embryonic stem cells. *Cell* 134, 521-533.

McLean, C.Y., Bristor, D., Hiller, M., Clarke, S.L., Schaar, B.T., Lowe, C.B., Wenger, A.M., and Bejerano, G. (2010). GREAT improves functional interpretation of cis-regulatory regions. *Nature biotechnology* 28, 495-501.
